# Supplementary material for: Detection of Minimal Residual Disease in B Lymphoblastic Leukemia by High-Throughput Sequencing of IGH
Source: Oxford University Press journal article supplement (doi:10.1158/1078-0432.ccr-13-3231), 2014-06-26
Supplement: 10780432ccr133231-sup-123355_2_supp_2483391_n5xpxc.docx [file 10780432ccr133231-sup-123355_2_supp_2483391_n5xpxc.docx]

**Case 1**


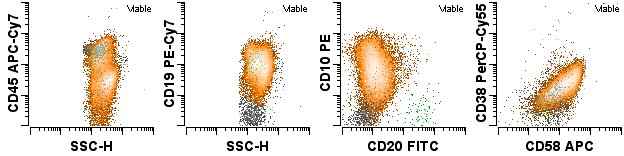


**Case 2**

**
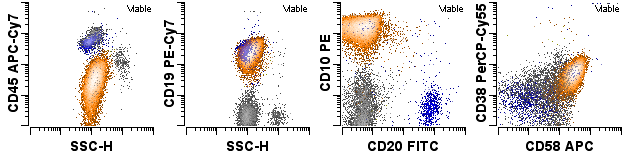
**

**Case 3**


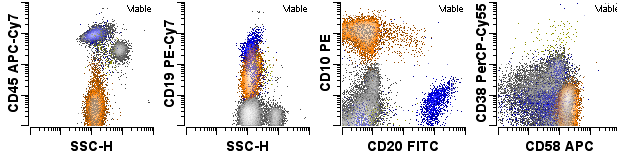


**Case 4**

**
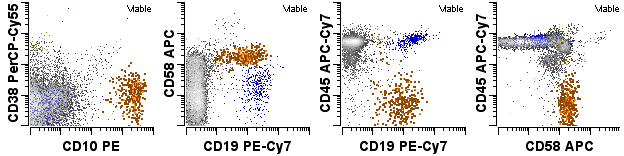
**

**Case 5**
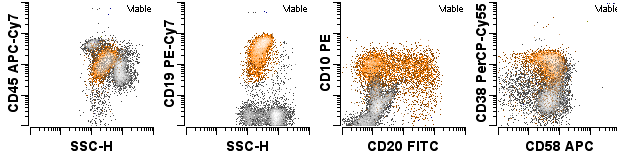


**Supplementary Figure 4: Pre-treatment flow cytometry for 5 cases with no clonal rearrangement of *IGH*, either complete V-DJ or incomplete DJ rearrangements at >10%, by high-throughput sequencing.**
