# Supplementary material for: Detection of Minimal Residual Disease in B Lymphoblastic Leukemia by High-Throughput Sequencing of IGH
Source: Oxford University Press journal article supplement (doi:10.1158/1078-0432.ccr-13-3231), 2014-06-26
Supplement: 10780432ccr133231-sup-123355_2_supp_2483393_n5xpxm.docx [file 10780432ccr133231-sup-123355_2_supp_2483393_n5xpxm.docx]

**A)**

**
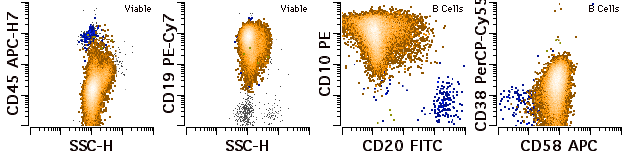
**

**B)**

**
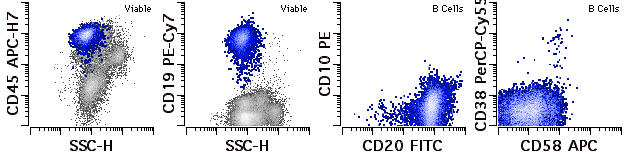
**

**Supplementary Figure 6: Pre-treatment flow cytometry with post-treatment MRD by HTS identified in a triple flow cytometry-sorted fraction of mature B cells.**
