# Supplementary material for: Detection of Minimal Residual Disease in B Lymphoblastic Leukemia by High-Throughput Sequencing of IGH
Source: Oxford University Press journal article supplement (doi:10.1158/1078-0432.ccr-13-3231), 2014-06-26
Supplement: 10780432ccr133231-sup-123355_2_supp_2483394_n5xpx2.docx [file 10780432ccr133231-sup-123355_2_supp_2483394_n5xpx2.docx]

| **Case** | **CD10** | **CD19** | **CD20** | **CD34** | **CD38** | **CD45** | **CD58** | **CD9** | **CD13/33** |
| --- | --- | --- | --- | --- | --- | --- | --- | --- | --- |
| 1 | L/I | L/I | – | – /L | L | L/I | H | I | – /L |
| 2 | H | I | – | I | L | L | H | – /L | L |
| 3 | H | L | – | I | – | – | H | H | – /L |
| 4 | H | L/I | – | L/I | – | – | H | I | L/I |
| 5 | I | I/H | – /I | – | I | I | I | H | – /L |

**Supplementary Table 1: Summary of immunophenotype of 5 cases with no clonal *IGH* gene rearrangement but abnormal B lymphoblast population by flow cytometry.**
