# Supplementary figures and images for: Detection of Minimal Residual Disease in B Lymphoblastic Leukemia by High-Throughput Sequencing of IGH
Source: Oxford University Press journal article supplement (doi:10.1158/1078-0432.ccr-13-3231), 2014-06-26

**
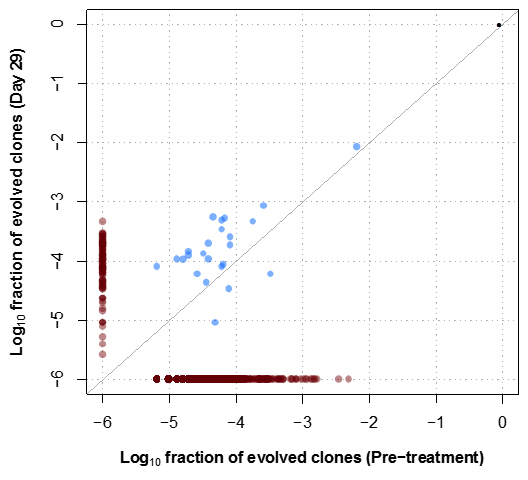
**

**Supplementary Figure 5. Example of evolved clonotypes in one patient.**

Supplement: 10780432ccr133231-sup-123355_2_supp_2483392_n5xpxj.docx [file 10780432ccr133231-sup-123355_2_supp_2483392_n5xpxj.docx]
